# Supplementary material for: Structure searching and phase relationships in MnN up to 50 GPa: a DFT study
Source: Royal Society of Chemistry journal article supplement (doi:10.1039/d4cp03588g), 2024-01-01
Supplement: d4cp03588g1.pdf [file d4cp03588g1.pdf]

## Supporting Information

### Structure searching and phase relations in MnN up to 50 GPa: a DFT study

Nursultan E. Sagatov\*<sup>a</sup>, Aitolkyn S. Omarkhan<sup>b</sup>, Assyl-Dastan B. Bazarbek\*<sup>b</sup>,  
Abdirash T. Akilbekov<sup>b</sup>, Dinara N. Sagatova<sup>a</sup>

<sup>a</sup> Sobolev Institute of Geology and Mineralogy, Siberian Branch, Russian Academy of Science, Novosibirsk 630090, Russian Federation

<sup>b</sup> Department of Physics and Technics, L. N. Gumilyov Eurasian National University, Astana, Kazakhstan

\*Corresponding authors: Nursultan E. Sagatov ([n.e.sagatov@gmail.com](mailto:n.e.sagatov@gmail.com)), Assyl-Dastan B. Bazarbek ([asyl.bazarbek.92@mail.ru](mailto:asyl.bazarbek.92@mail.ru))

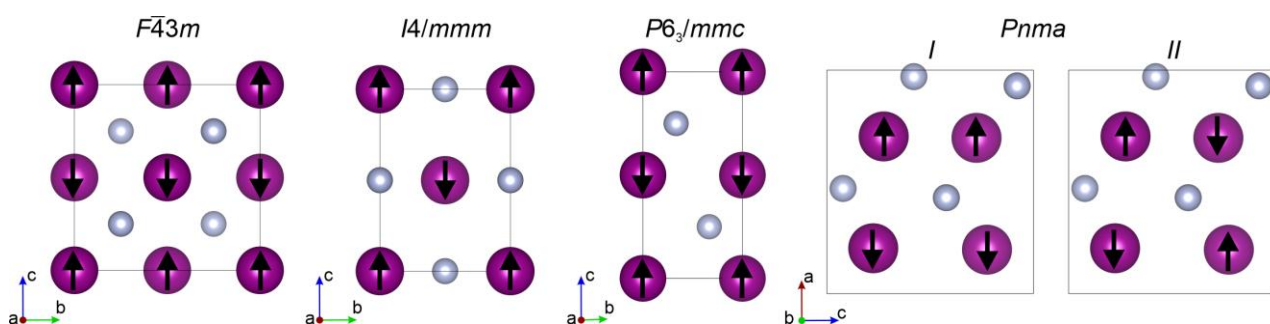

Figure S1. The considered initial antiferromagnetic configurations for the predicted MnN polymorphs.

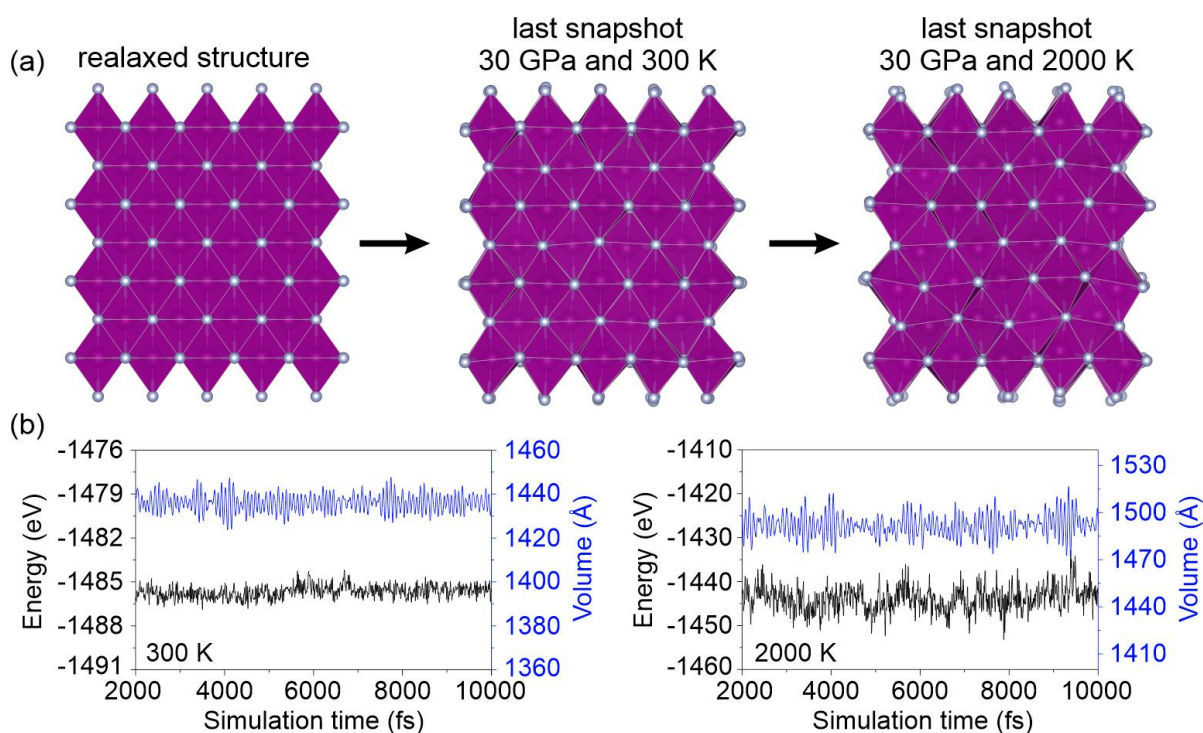

Figure S2. (a) The relaxed structure of MnN-*I4/mcm* and the last snapshots from the MD simulations at 30 GPa and 300 and 2000 K. (b) Calculated energy and volume as a function of simulation time at 30 GPa and 300 and 2000 K.

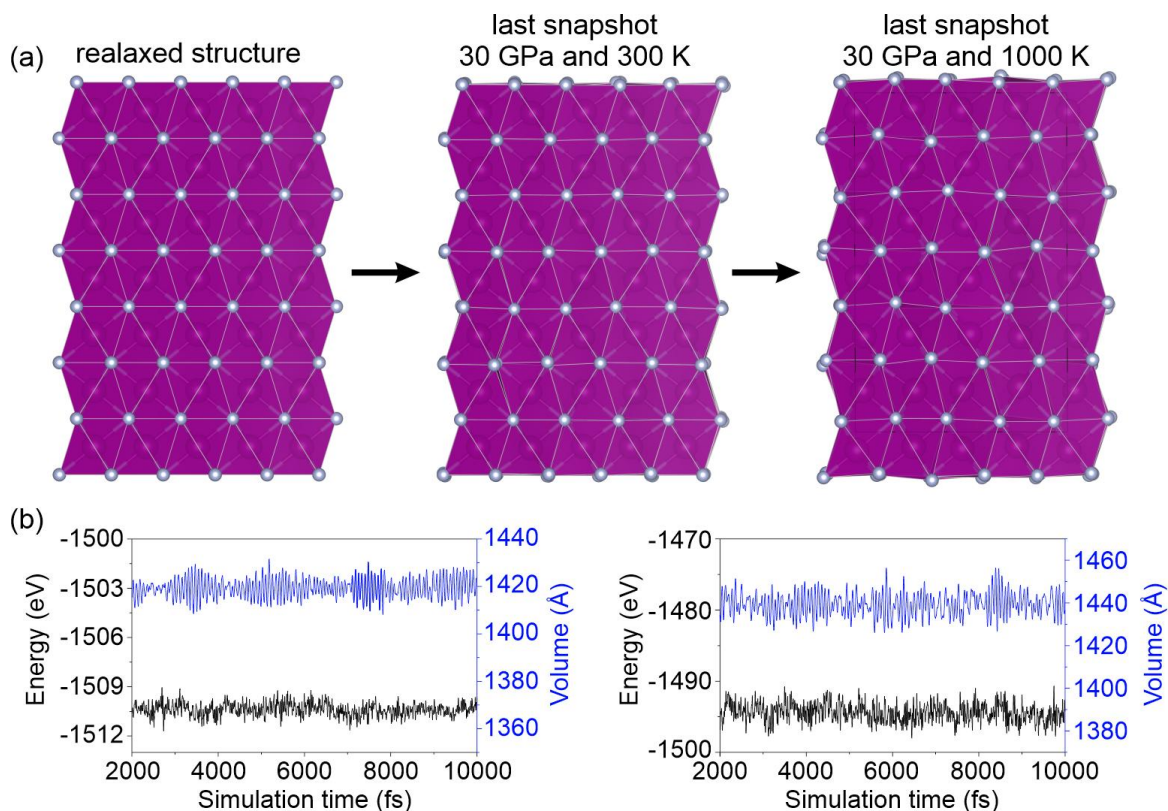

Figure S3. (a) The relaxed structure of MnN- $P6_3/mmc$  and the last snapshots from the MD simulations at 30 GPa and 300 and 1000 K. (b) Calculated energy and volume as a function of simulation time at 30 GPa and 300 and 2000 K.

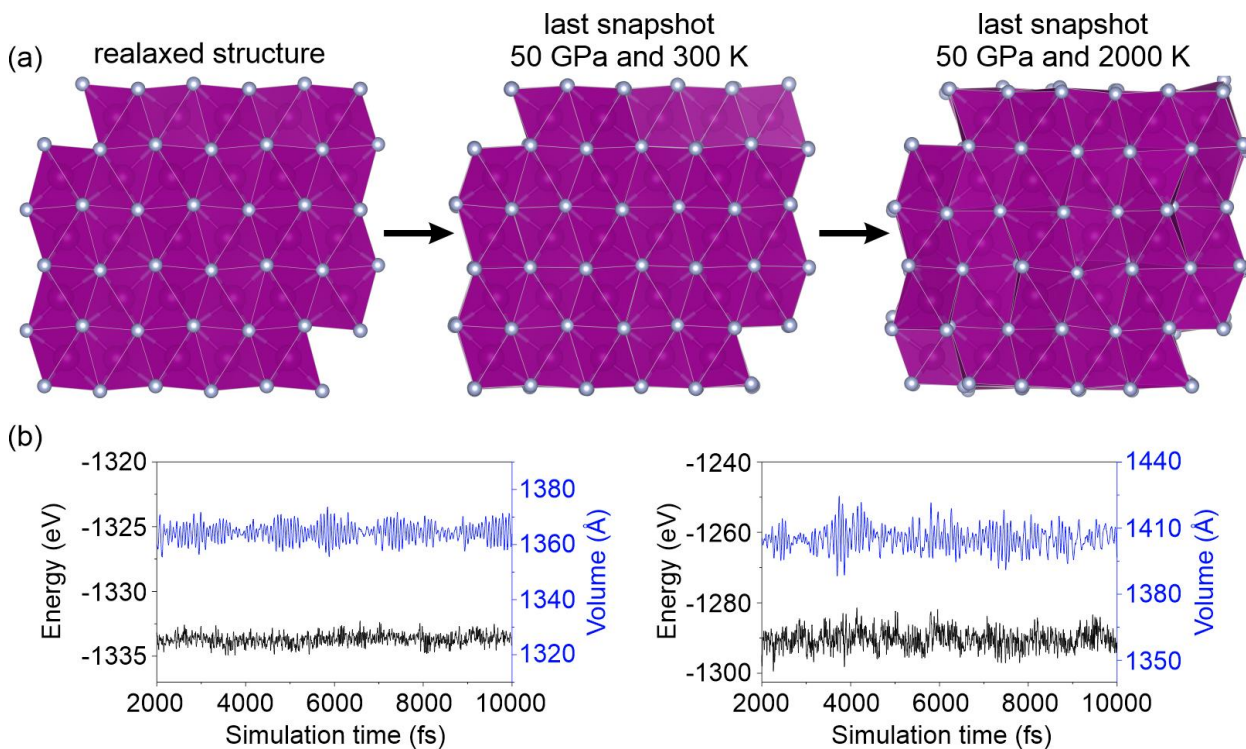

Figure S4. (a) The relaxed structure of MnN- $Pnma$  and the last snapshots from the MD simulations at 50 GPa and 300 and 2000 K. (b) Calculated energy and volume as a function of simulation time at 30 GPa and 300 and 2000 K.

Table S1. Calculated enthalpies of MnN polymorphs with  $U_{eff} = 3.9$  eV at 58 GPa. Relative enthalpies  $\Delta H$  are normalized to the enthalpy of  $P6_3/mmc$ .

| Polymorph    | Magnetic state | Enthalpy (eV/f.u.) | $\Delta H$ (eV/f.u.) |
|--------------|----------------|--------------------|----------------------|
| $P6_3/mmc$   | <i>afm</i>     | -8.74027           | 0.07111              |
|              | <i>fm</i>      | -8.81138           | 0                    |
|              | <i>nm</i>      | -7.82395           | 0.98743              |
| $Pnma$       | <i>fm</i>      | -8.81088           | 0.00050              |
|              | <i>nm</i>      | -7.82699           | 0.98439              |
| $I4/mmm$     | <i>afm</i>     | -8.74027           | 0.07111              |
|              | <i>nm</i>      | -7.82395           | 0.98743              |
| $Fm\bar{3}m$ | <i>fm</i>      | -9.08220           | -0.27081             |
|              | <i>nm</i>      | -7.09535           | 1.71603              |
| $F\bar{4}3m$ | <i>afm</i>     | -7.51206           | 1.29932              |
|              | <i>fm</i>      | -7.41699           | 1.39439              |
|              | <i>nm</i>      | -6.87959           | 1.93179              |

\*It is worth noting that the study of phase relations using the DFT+U method is invalid, since for each polymorph it is necessary to select its own parameter  $U_{eff}$  and the energies obtained with different U cannot be compared (as mentioned in the VASP manual). Here we perform DFT+U calculations just to show the invalidity of the obtained enthalpy relations with U correction.

Table S2. Calculated elastic constants  $C_{ij}$  (in GPa) of MnN polymorphs at various pressures (GPa).

| Phase        | Pressure | $C_{11}$ | $C_{12}$ | $C_{13}$ | $C_{22}$ | $C_{23}$ | $C_{33}$ | $C_{44}$ | $C_{55}$ | $C_{66}$ |
|--------------|----------|----------|----------|----------|----------|----------|----------|----------|----------|----------|
| $I4/mmm$     | 0        | 164.2    | 56.2     | 46.1     | 164.2    | 46.1     | 170.6    | 42.3     | 42.3     | 48.1     |
|              | 10       | 424.6    | 159.4    | 108.6    | 423.9    | 108.6    | 448      | 103.6    | 103.6    | 132.5    |
|              | 20       | 487.1    | 220.3    | 146.1    | 487      | 146.1    | 591.6    | 100.2    | 100.2    | 194      |
|              | 30       | 541.9    | 274.6    | 149.7    | 542.2    | 149.7    | 703.7    | 95.4     | 95.4     | 238.8    |
|              | 40       | 577.2    | 307.9    | 163.6    | 577.6    | 163.6    | 789.2    | 87.6     | 87.6     | 259.6    |
| $F\bar{4}3m$ | 0        | 303.3    | 207.6    | 207.6    | 303.3    | 207.6    | 303.3    | 31.2     | 31.2     | 31.2     |
|              | 5        | 300.9    | 220.3    | 220.3    | 300.9    | 220.3    | 300.9    | 14.1     | 14.1     | 14.1     |
| $P6_3/mmc$   | 5        | 458.6    | 167.0    | 148.3    | 461.7    | 148.3    | 668.0    | 157.3    | 157.3    | 146.0    |
|              | 10       | 479.0    | 187.4    | 168.2    | 483.4    | 168.2    | 705.1    | 172.8    | 172.8    | 146.9    |
|              | 20       | 513.0    | 221.9    | 209.6    | 520.1    | 209.6    | 791.1    | 201.4    | 201.4    | 148.7    |
|              | 30       | 505.4    | 255      | 247.6    | 527.8    | 247.6    | 873.6    | 228.7    | 228.7    | 143.0    |
|              | 40       | 375.5    | 218.7    | 429.4    | 366.4    | 429.4    | 940.4    | 251.7    | 251.8    | 97.0     |
| $Pnma$       | 40       | 906.1    | 421.3    | 480.7    | 660.6    | 300.1    | 661.6    | 194.7    | 260.0    | 281.8    |
|              | 50       | 986.1    | 437.7    | 499.3    | 780.0    | 382.4    | 788.1    | 203.2    | 280.0    | 304.5    |

**The Born stability criteria**

For cubic crystals:

$$C_{11} > 0, \quad C_{44} > 0, \quad C_{11} > |C_{12}|, \quad (C_{11} + 2C_{12}) > 0$$

For hexagonal crystals:

$$C_{44} > 0, \quad C_{11} > |C_{12}|, \quad (C_{11} + 2C_{12})C_{33} - 2C_{13}^2 > 0$$

For tetragonal crystals:

$$C_{11} > 0, \quad C_{33} > 0, \quad C_{44} > 0, \quad C_{66} > 0, \\ (C_{11} - C_{12}) > 0, \quad (C_{11} + C_{33} - 2C_{13}) > 0, \quad [2(C_{11} + C_{12}) + C_{33} + 4C_{13}] > 0$$

For orthorhombic crystals:

$$C_{11} > 0, \quad C_{22} > 0, \quad C_{33} > 0, \quad C_{44} > 0, \quad C_{55} > 0, \quad C_{66} > 0, \\ [C_{11} + C_{22} + C_{33} + 2(C_{12} + C_{13} + C_{23})] > 0, \quad (C_{11} + C_{22} - 2C_{12}) > 0, \\ (C_{11} + C_{33} - 2C_{13}) > 0, \quad (C_{22} + C_{33} - 2C_{23}) > 0$$
